# Supplementary material for: Variations in EUV Irradiance: Comparison between LYRA, ESP, and SWAP Integrated Flux
Source: Hindawi journal article supplement (doi:10.1155/2014/957461), 2014-01-01
Supplement: f1 [file 957461.f1.zip]

Archive with 1 entries (1 files):
- 957461/mat.957461.v2.mp4
